# Supplementary material for: Analysis of Scat for Gut Microbiome Identification in Wolves from a Mediterranean and an Alpine Area
Source: MDPI journal article supplement (doi:10.3390/d15010037), 2022-12-29
Supplement: s1 [file s1]

| Sample | Pack     | Raw reads | QC passed | %     | Denoised | Merged | %     | Non chimeric | %     | Raw features | Non mitochondrial or chloroplast |
|--------|----------|-----------|-----------|-------|----------|--------|-------|--------------|-------|--------------|----------------------------------|
| A1     | PackLTA2 | 63643     | 32658     | 51.31 | 31762    | 25464  | 40.01 | 12220        | 19.2  | 12220        | 12216                            |
| A2     | PackLTA2 | 67245     | 34650     | 51.53 | 33837    | 30169  | 44.86 | 22450        | 33.39 | 22450        | 22445                            |
| A3     | PackLTA2 | 60208     | 30005     | 49.84 | 29075    | 25041  | 41.59 | 18069        | 30.01 | 18069        | 18069                            |
| B1     | PackLTA2 | 74611     | 36310     | 48.67 | 34702    | 27252  | 36.53 | 12870        | 17.25 | 12870        | 12830                            |
| B2     | PackLTA2 | 86526     | 46323     | 53.54 | 44791    | 33945  | 39.23 | 17883        | 20.67 | 17883        | 17877                            |
| B3     | PackLTA2 | 77473     | 39625     | 51.15 | 38116    | 28202  | 36.4  | 14646        | 18.9  | 14646        | 14636                            |
| C1     | PackLTA2 | 63455     | 33479     | 52.76 | 31996    | 24847  | 39.16 | 11933        | 18.81 | 11933        | 11930                            |
| C2     | PackLTA2 | 63453     | 32412     | 51.08 | 31440    | 25315  | 39.9  | 12441        | 19.61 | 12441        | 12441                            |
| C3     | PackLTA2 | 76305     | 39773     | 52.12 | 38086    | 28383  | 37.2  | 13284        | 17.41 | 13284        | 13284                            |
| D1     | PackLTA1 | 73892     | 36223     | 49.02 | 35074    | 28343  | 38.36 | 15794        | 21.37 | 15794        | 15791                            |
| D2     | PackLTA1 | 64860     | 30717     | 47.36 | 29509    | 24350  | 37.54 | 13431        | 20.71 | 13431        | 13431                            |
| D3     | PackLTA1 | 58063     | 27547     | 47.44 | 26598    | 21982  | 37.86 | 12350        | 21.27 | 12350        | 12346                            |
| E1     | PackLTA1 | 89985     | 46081     | 51.21 | 44854    | 38540  | 42.83 | 22126        | 24.59 | 22126        | 22126                            |
| E2     | PackLTA1 | 82600     | 41140     | 49.81 | 40103    | 34682  | 41.99 | 20677        | 25.03 | 20677        | 20667                            |
| E3     | PackLTA1 | 80132     | 39862     | 49.75 | 38837    | 34071  | 42.52 | 21643        | 27.01 | 21643        | 21635                            |
| F1     | PackLTA1 | 49818     | 13998     | 28.1  | 13460    | 11167  | 22.42 | 7095         | 14.24 | 7095         | 7095                             |
| F2     | PackLTA1 | 66887     | 30647     | 45.82 | 29858    | 26763  | 40.01 | 19305        | 28.86 | 19305        | 19305                            |
| F3     | PackLTA1 | 83760     | 39714     | 47.41 | 38786    | 35702  | 42.62 | 27027        | 32.27 | 27027        | 27023                            |
| G1     | PackM1   | 63033     | 32350     | 51.32 | 30089    | 19439  | 30.84 | 11166        | 17.71 | 11166        | 11166                            |
| G2     | PackM1   | 43690     | 21623     | 49.49 | 19782    | 13491  | 30.88 | 8721         | 19.96 | 8721         | 8716                             |
| G3     | PackM1   | 75410     | 38316     | 50.81 | 35382    | 23349  | 30.96 | 14405        | 19.1  | 14405        | 14398                            |
| H1     | PackM1   | 121484    | 63173     | 52    | 61633    | 50067  | 41.21 | 23632        | 19.45 | 23632        | 23622                            |
| H2     | PackM1   | 88853     | 45058     | 50.71 | 43943    | 36061  | 40.59 | 17896        | 20.14 | 17896        | 17892                            |
| H3     | PackM1   | 60468     | 31363     | 51.87 | 30283    | 24491  | 40.5  | 12145        | 20.09 | 12145        | 12145                            |
| I1     | PackM1   | 138509    | 71248     | 51.44 | 69416    | 55526  | 40.09 | 27185        | 19.63 | 27185        | 27180                            |
| I2     | PackM1   | 75174     | 38617     | 51.37 | 37472    | 30658  | 40.78 | 16162        | 21.5  | 16162        | 16153                            |
| I3     | PackM1   | 122137    | 60467     | 49.51 | 59004    | 48459  | 39.68 | 24504        | 20.06 | 24504        | 24504                            |
| L1     | PackM2   | 241152    | 116075    | 48.13 | 113055   | 86675  | 35.94 | 39515        | 16.39 | 39515        | 39513                            |
| L2     | PackM2   | 76985     | 37184     | 48.3  | 35892    | 27276  | 35.43 | 13740        | 17.85 | 13740        | 13740                            |
| L3     | PackM2   | 148556    | 72144     | 48.56 | 69773    | 51351  | 34.57 | 25401        | 17.1  | 25401        | 25391                            |
| M1     | PackM2   | 79099     | 42316     | 53.5  | 40995    | 30634  | 38.73 | 14501        | 18.33 | 14501        | 14494                            |
| M2     | PackM2   | 88657     | 45151     | 50.93 | 43678    | 32655  | 36.83 | 15467        | 17.45 | 15467        | 15467                            |
| M3     | PackM2   | 42549     | 22246     | 52.28 | 21225    | 15503  | 36.44 | 7594         | 17.85 | 7594         | 7589                             |
| N1     | PackM2   | 81005     | 43711     | 53.96 | 42787    | 34818  | 42.98 | 17325        | 21.39 | 17325        | 17319                            |
| N2     | PackM2   | 59781     | 30669     | 51.3  | 29863    | 24361  | 40.75 | 12331        | 20.63 | 12331        | 12331                            |
| N3     | PackM2   | 52414     | 26108     | 49.81 | 25442    | 20450  | 39.02 | 10071        | 19.21 | 10071        | 10061                            |

**Table S1:** Reads passing different filters (number and percentage). Numbers represent read pairs. The last column reports the number of *bona-fide* sequences that were analyzed in the following steps.
